# Supplementary material for: Local modulation of Au/MoS2 Schottky barriers using a top ZnO nanowire gate for high-performance photodetection
Source: Royal Society of Chemistry journal article supplement (doi:10.1039/d3nh00448a), 2023-11-28
Supplement: d3nh00448a1.pdf [file d3nh00448a1.pdf]

## Supporting Information

### **Local Control of Au/MoS<sub>2</sub> Schottky Barrier by Top ZnO Nanowire Gate for High-Performance Photodetection**

*Yu Xiao<sup>1</sup>, Guisheng Zou<sup>1</sup>, Jinpeng Huo<sup>1</sup>, Tianming Sun<sup>1,2</sup>, Jin Peng<sup>1</sup>, Zehua Li<sup>1</sup>, Daozhi Shen<sup>3</sup>,  
Lei Liu<sup>1,\*</sup>*

<sup>1</sup> Department of Mechanical Engineering, State Key Laboratory of Tribology, Key Laboratory for Advanced Manufacturing by Materials Processing Technology, Ministry of Education of PR China, Tsinghua University, Beijing 100084, P. R. China

<sup>2</sup> College of Materials Science and Engineering, Taiyuan University of Technology, Taiyuan 030024, Shanxi Province, China

<sup>3</sup> Institute for Quantum Computing, Department of Chemistry, Centre for Advanced Materials Joining, University of Waterloo, Waterloo, Ontario, N2L 3G1 Canada

\* Corresponding author. E-mail address: liulei@tsinghua.edu.cn

# Table of Contents

|                                                                                                      |           |
|------------------------------------------------------------------------------------------------------|-----------|
| <b>I. Supplementary Figures.....</b>                                                                 | <b>3</b>  |
| <b>1. Detailed fabrication processes .....</b>                                                       | <b>3</b>  |
| <b>2. The diameter of the left ZnO .....</b>                                                         | <b>4</b>  |
| <b>3. Detailed Raman test positions.....</b>                                                         | <b>5</b>  |
| <b>4. Comparison between the photodetecting areas and the device .....</b>                           | <b>6</b>  |
| <b>5. The supplementary photodetecting performances of Au-MoS<sub>2</sub> Schottky junction.....</b> | <b>7</b>  |
| <b>6. The simulation of the distribution of light field near the nanowire .....</b>                  | <b>13</b> |
| <b>7. The influence region of ZnO nanowire on left side.....</b>                                     | <b>14</b> |
| <b>8. The detailed transfer characteristics of the left NG .....</b>                                 | <b>15</b> |
| <b>II. Supplementary Table .....</b>                                                                 | <b>16</b> |

# I. Supplementary Figures

## 1. Detailed fabrication processes

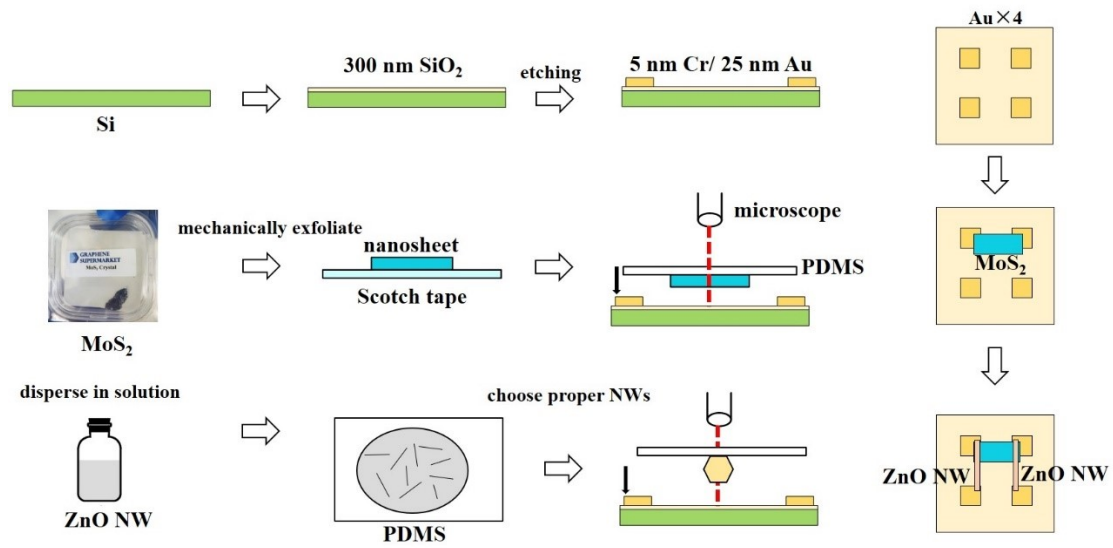

**Figure S1.** The fabrication process of the MoS<sub>2</sub> device with ZnO nanowire gates.

## 2. The diameter of the left ZnO

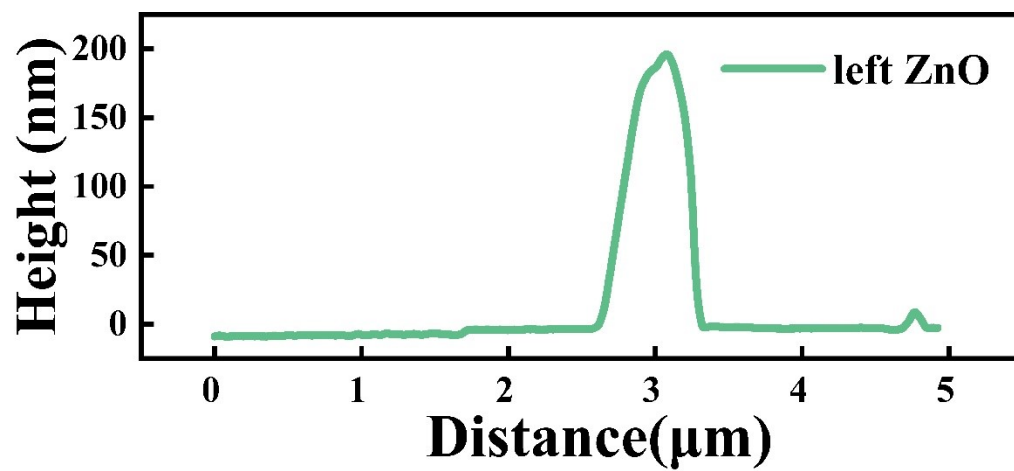

**Figure S2.** The diameter of the left ZnO in Figure 1b using AFM testing

### 3. Detailed Raman test positions

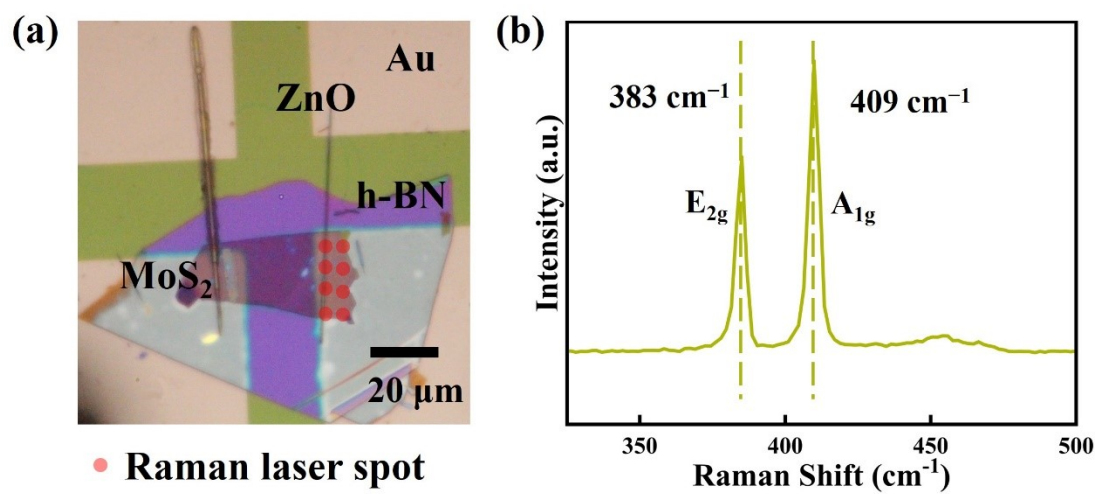

**Figure S3.** Detailed Raman test positions in the NG device. (a) An 1 μm Raman spot is focused at eight locations in the red regions, and the right ZnO nanowire cross through the left four detection spots. (b) The eight results are the same, and no peaks of ZnO appear in the Raman tests.

#### 4. Comparison between the photodetecting areas and the device

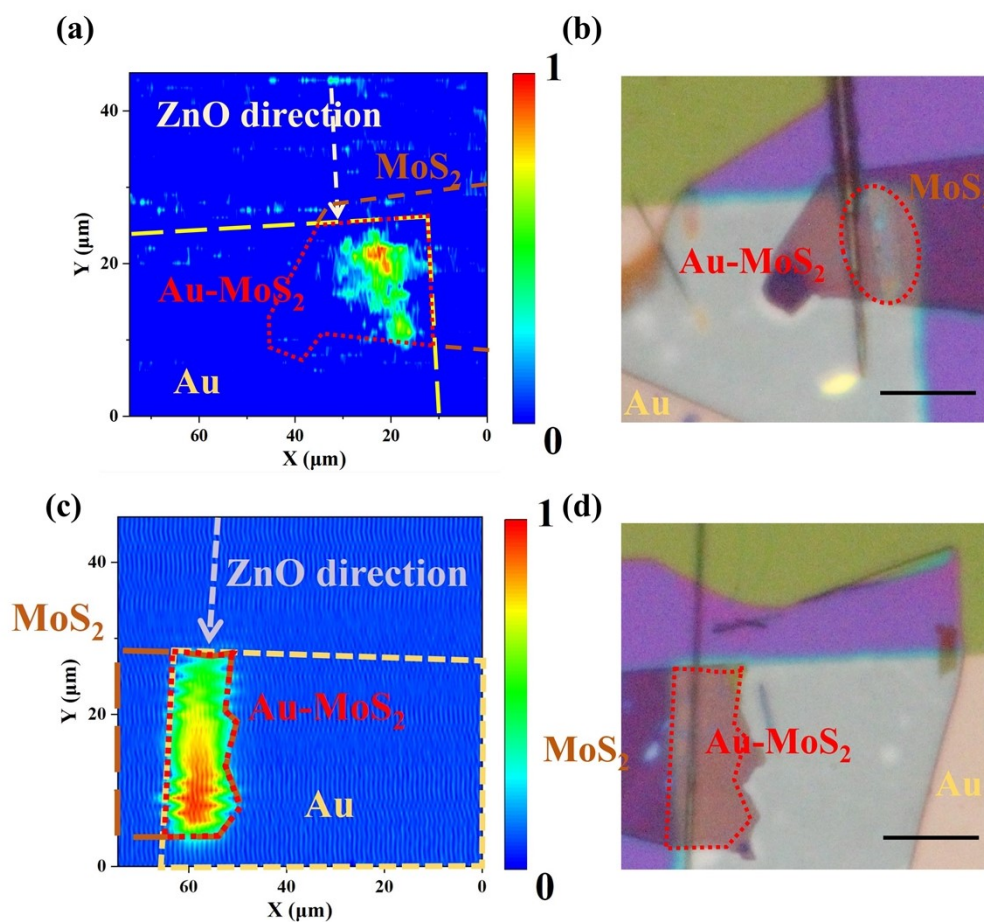

**Figure S4.** Photo-mapping of the Au-MoS<sub>2</sub> structure on both sides. (a) The normalized photodetecting intensity on the left side. (b) The corresponding optical image of Au-MoS<sub>2</sub> on the left side. (c) The normalized photodetecting intensity on the right side. (d) The corresponding optical image of Au-MoS<sub>2</sub> on the right side. Scale bar: 20 μm.

## 5. The supplementary photodetecting performances of Au-MoS<sub>2</sub> Schottky junction

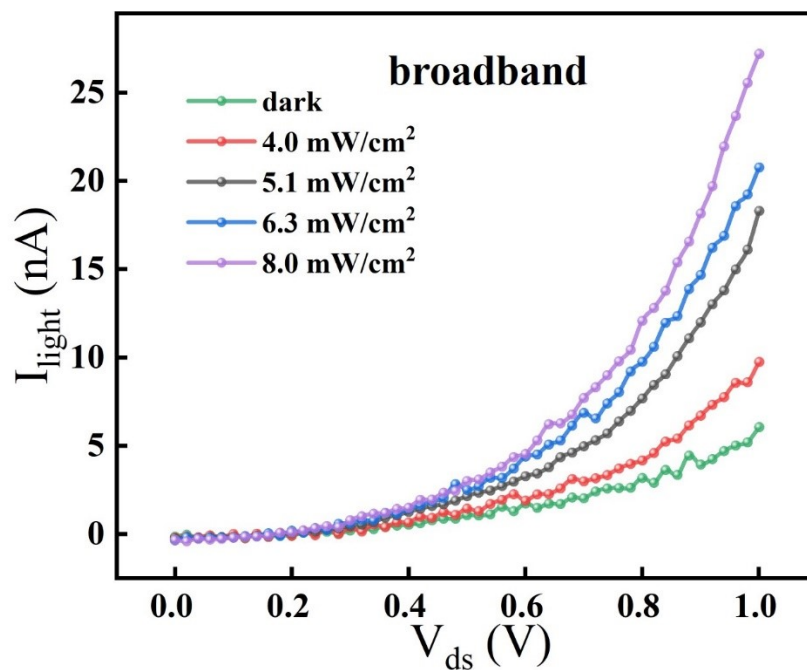

**Figure S5.** The photodetecting performances of Au-MoS<sub>2</sub> Schottky junction under a broadband halogen light.

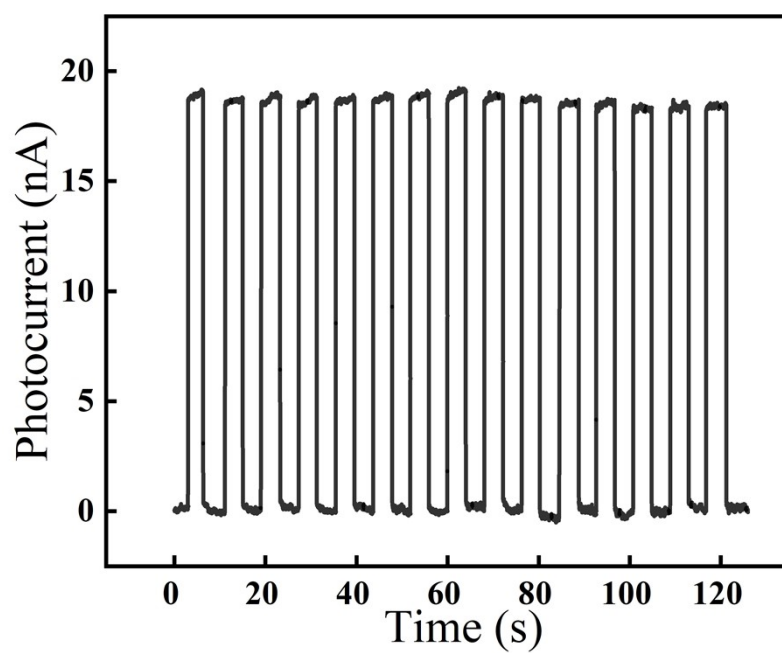

**Figure S6.** The photodetecting performances of Au-MoS<sub>2</sub> Schottky junction under on/off cycles of 5 mW/cm<sup>2</sup> halogen light.



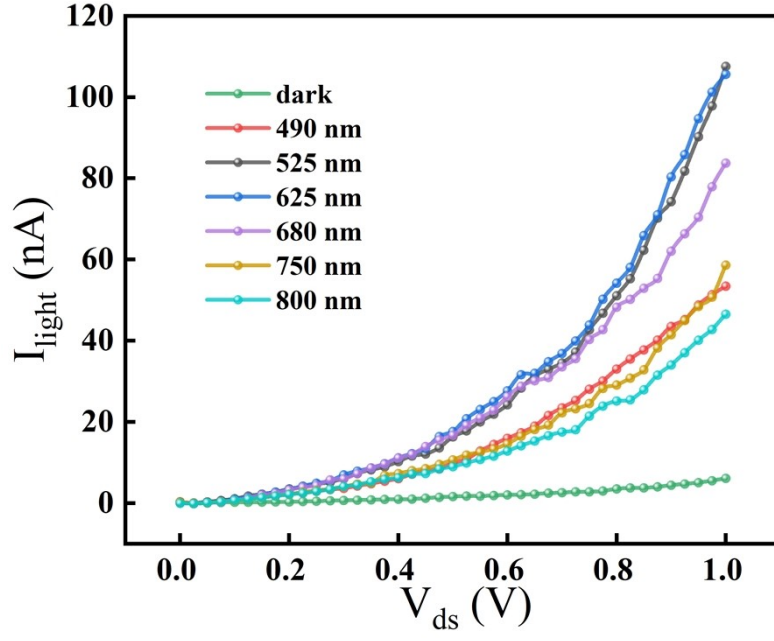

**Figure S7.**  $I_{ds}$ - $V_{ds}$  curves of the Au-MoS<sub>2</sub> Schottky junction when exposed to light at different wavelengths of 1 mW/cm<sup>2</sup> when no bias is applied to NG.

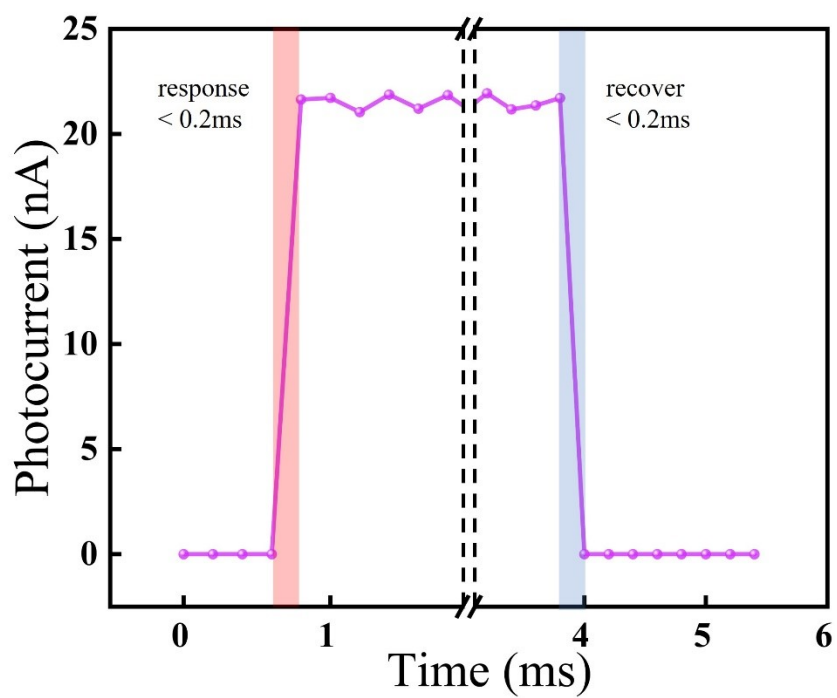

**Figure S8.** The response and recover speed of the Schottky photodetector.

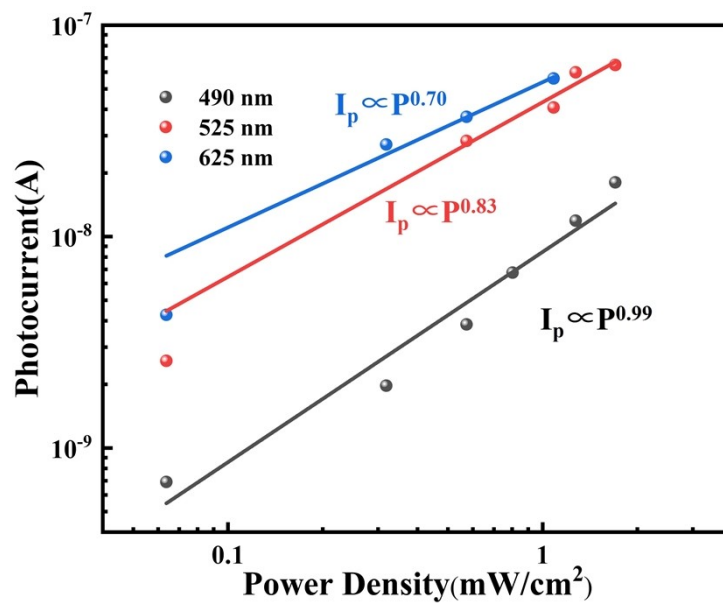

**Figure S9.** Linearity of the device when the incident light has a wavelength of 490 nm, 525 nm and 625 nm.

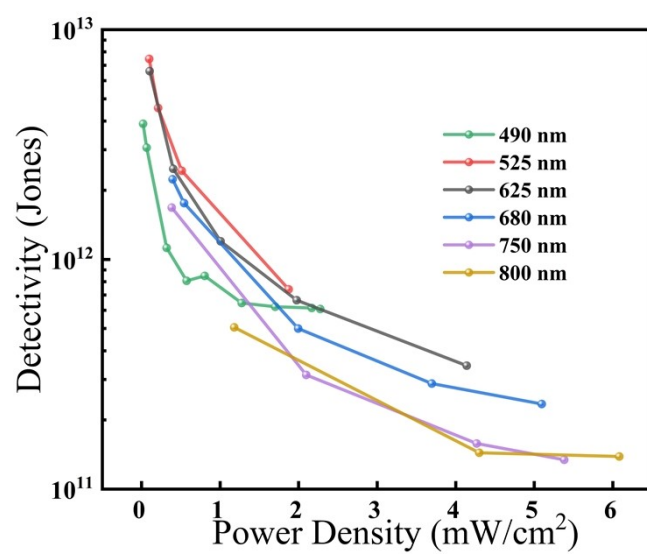

**Figure S10.** Detectivity under different power density when no NG bias is applied.

## 6. The simulation of the distribution of light field near the nanowire

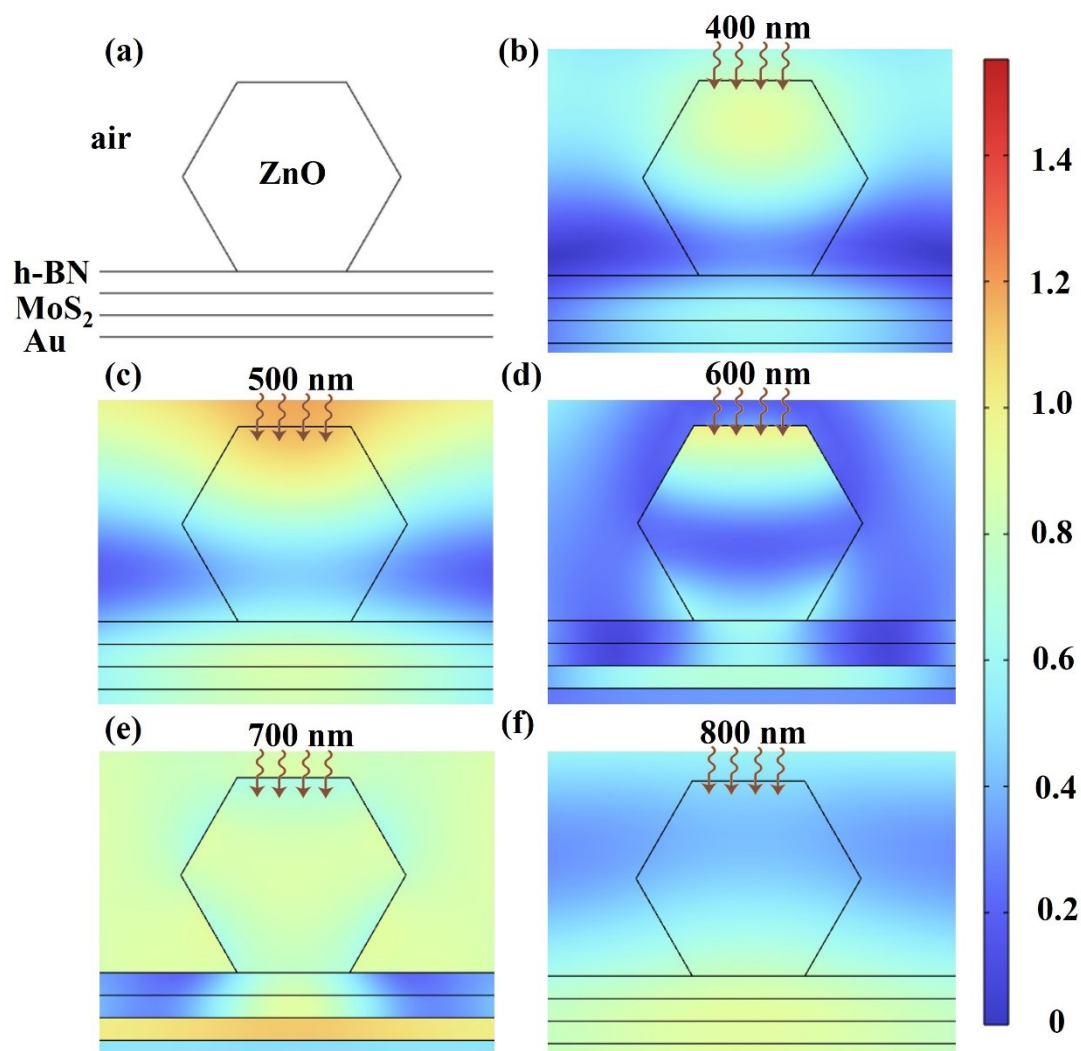

**Figure S11.** The simulation of the distribution of light field near the nanowire. (a)

The basic model of the simulation. (b)-(f) The simulation of the distribution of light field when the incident light is 400 nm (b), 500 nm (c), 600 nm (d), 700 nm (e), 800 nm (f), respectively.

## 7. The influence region of ZnO nanowire on left side

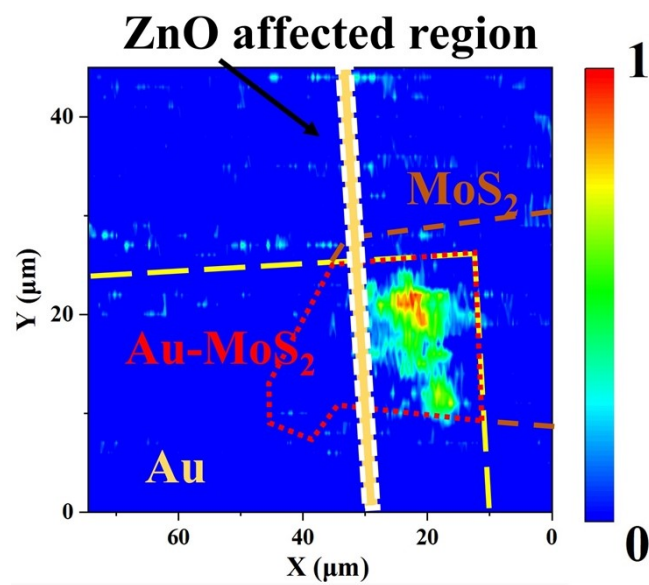

**Figure S12.** The influence region of ZnO nanowire on left side deviates from the main photocurrent region.

## 8. The detailed transfer characteristics of the left NG

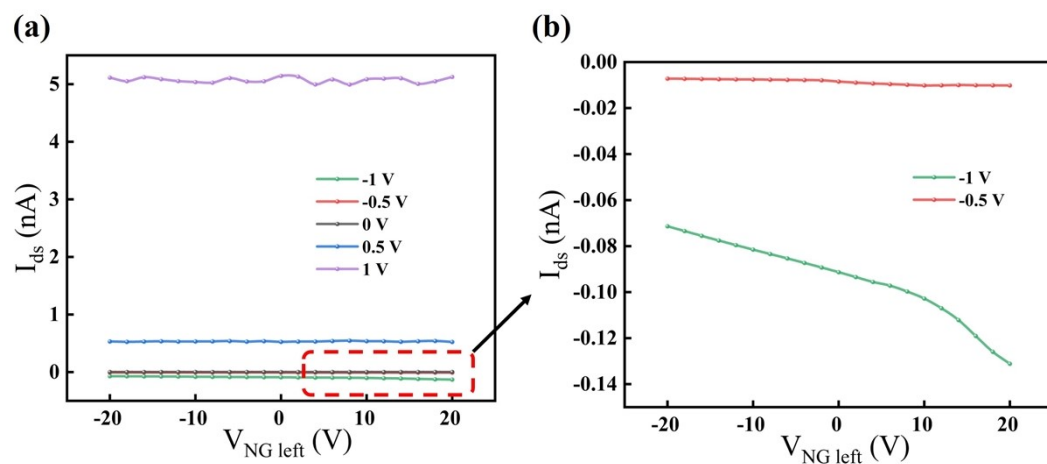

**Figure S13.** The detailed transfer characteristics of the left NG. (a) The gating effect is not as obvious on the right junction. (b) The red area in (a) is enlarged and the nanowire on the left can gate the left Schottky junction.

## II. Supplementary Table

**Table1.** Comparison of device performances of MoS<sub>2</sub> Schottky based photodetectors.

| Schottky<br>Type               | Wavelen<br>gth (nm) | Gate Type               | V <sub>ds</sub><br>(V) | Responsivity<br>(A/W) | On/off<br>Ratio     | Detectivity<br>(Jones) | Ref                  |
|--------------------------------|---------------------|-------------------------|------------------------|-----------------------|---------------------|------------------------|----------------------|
| Au/MoS <sub>2</sub> /Au        | 525/625             | nanowire<br>gate (-20V) | 1                      | 1.3×10 <sup>2</sup>   | 6×10 <sup>3</sup>   | 1.4×10 <sup>13</sup>   | <b>This<br/>work</b> |
| Au/MoS <sub>2</sub> /Au        | 445                 | -                       | 10                     | 0.05                  | -                   | 1.55×10 <sup>9</sup>   | <b>1</b>             |
| Au/MoS <sub>2</sub> /Ti        | 1310                | -                       | 1                      | 1.9                   | -                   | 2.3×10 <sup>11</sup>   | <b>2</b>             |
| MoS <sub>2</sub> /Pd           | 488                 | ion gate<br>(0~6 V)     | 1                      | 0.24                  | 1×10 <sup>6</sup>   | 1.7×10 <sup>11</sup>   | <b>3</b>             |
| MoS <sub>2</sub> /CNT          | 532                 | -                       | 1                      | 2.01×10 <sup>3</sup>  | -                   | 3.2×10 <sup>12</sup>   | <b>4</b>             |
| MoS <sub>2</sub> /Cr           | 650                 | backgate<br>(-60 V)     | 5                      | 4.10×10 <sup>3</sup>  | 1.6×10 <sup>2</sup> | 1.34×10 <sup>13</sup>  | <b>5</b>             |
| 2H-1T@2H<br>MoS <sub>2</sub>   | 530                 | backgate<br>(18 V)      | 20                     | 1.92×10 <sup>3</sup>  | -                   | 7.55×10 <sup>11</sup>  | <b>6</b>             |
| MoS <sub>2</sub> /<br>graphene | 432                 | backgate<br>(-3 V)      | 0.5                    | 2.2×10 <sup>5</sup>   | 4×10 <sup>4</sup>   | 3.5×10 <sup>13</sup>   | <b>7</b>             |
| MoS <sub>2</sub> /TaIrTe<br>4  | 635                 | backgate.<br>(-40 V)    | 1                      | 0.89                  | 1×10 <sup>4</sup>   | ~9×10 <sup>11</sup>    | <b>8</b>             |



## Reference

1. Y. Xie, B. Zhang, S. Wang, D. Wang, A. Wang, Z. Wang, H. Yu, H. Zhang, Y. Chen, M. Zhao, B. Huang, L. Mei and J. Wang. Ultrabroadband MoS<sub>2</sub> Photodetector with Spectral Response from 445 to 2717 nm. *Adv Mater.* **2017**, 29 (17), 1605972.
2. Y. Mao, P. Xu, Q. Wu, J. Xiong, R. Peng, W. Huang, S. Chen, Z. Wu and C. Li. Self-Powered High-Detectivity Lateral MoS<sub>2</sub> Schottky Photodetectors for Near-Infrared Operation. *Adv. Electron. Mater.* **2021**, 7 (3), 2001138.
3. R. Chang, Q. Chen, W. Shen, Y. Zhang, B. Zhang and S. Wang. Controllable Switching between Highly Rectifying Schottky and p-n Junctions in an Ionic MoS<sub>2</sub> Device. *Adv. Funct. Mater.* **2023**, 33 (30), 2301010.
4. E.-X. Ding, P. Liu, H. H. Yoon, F. Ahmed, M. Du, A. M. Shafi, N. Mehmood, E. I. Kauppinen, Z. Sun and H. Lipsanen. Highly Sensitive MoS<sub>2</sub> Photodetectors Enabled with a Dry-Transferred Transparent Carbon Nanotube Electrode. *ACS Appl. Mater. Interfaces.* **2023**, 15 (3), 4216-4225.
5. Y. Sun, L. Jiang, Z. Wang, Z. Hou, L. Dai, Y. Wang, J. Zhao, Y.-H. Xie, L. Zhao, Z. Jiang, W. Ren and G. Niu. Multiwavelength High-Detectivity MoS<sub>2</sub> Photodetectors with Schottky Contacts. *ACS Nano* **2022**, 16 (12), 20272–20280.
6. I. Lee, W. T. Kang, J. E. Kim, Y. R. Kim, U. Y. Won, Y. H. Lee and W. J. Yu. Photoinduced Tuning of Schottky Barrier Height in Graphene/MoS<sub>2</sub> Heterojunction for Ultrahigh Performance Short Channel Phototransistor. *ACS Nano* **2020**, 14 (6), 7574-7580.
7. W. Wang, X. Zeng, J. H. Warner, Z. Guo, Y. Hu, Y. Zeng, J. Lu, W. Jin, S. Wang, J. Lu, Y. Zeng and Y. Xiao. Photoresponse-Bias Modulation of a High-Performance MoS<sub>2</sub> Photodetector with a Unique Vertically Stacked 2H-MoS<sub>2</sub>/1T@2H-MoS<sub>2</sub> Structure. *ACS Appl. Mater. Interfaces.* **2020**, 12 (29), 33325-33335.
8. L. Zhang, X. Han, S. Zhang, H. Wang, Y. Huang, Z. Zheng, N. Huo, W. Gao and J. Li. Gate-Tunable Photovoltaic Behavior and Polarized Image Sensor Based on All-2D TaIrTe<sub>4</sub>/MoS<sub>2</sub> Van Der Waals Schottky Diode. *Adv. Electron. Mater.* **2022**, 8 (11), 2200551.
